# Supplementary material for: Genetic Structure of the Ca Rater Mallorquí Dog Breed Inferred by Microsatellite Markers
Source: MDPI journal article supplement (doi:10.3390/ani12202733), 2022-10-11
Supplement: s1 [file s1]

**Table S1.** Microsatellites used, chromosome, fluorochrome, 5' and 3' sequence of the primers, size range in pb and multiplex reaction.

| Name      | Chromosome | Fluorochrome | 5'-3' Forward                          | 5'-Reverse                      | Size range (pb) | Multiplex |
|-----------|------------|--------------|----------------------------------------|---------------------------------|-----------------|-----------|
| CXX279    | 22         | HEX          | (30A) TGCTCAATGAAATAAGCCAGG            | GGCGACCTTCATTCTCTGAC            | 120-135         | P1        |
| FH2054    | 12         | 6-FAM        | GCCTTATTCATTGCAGTTAGGG                 | ATGCTGAGTTTGAACCTTCCC           | 140-170         | P1        |
| FH2848    | 2          | HEX          | TTTTTTTTTTTTTTTCAAACCAACCCATTCA<br>CTC | GTCACAAGGACTTTTCTCCTG           | 240-270         | P3        |
| AHT121    | 13         | 6-FAM        | TATTGCGAATGTCACCTGCTT                  | ATAGATACACTCTCTCTCCG            | 80-110          | P1        |
| AHT130    | 36         | NED          | GTTTCTCTCCCTTCGGGTTC                   | GACGTGTGTTCACGCCAG              | 110-140         | P3        |
| AHT137    | 11         | HEX          | TACAGAGCTCTTAAGTGGGTCC                 | CCTTGCAAAGTGTCTGCT              | 120-150         | P3        |
| AHT171    | 6          | NED          | AGGTGCAGAGCACTCACTCA                   | CCCATCCACAGTTCAGCTTT            | 220-245         | P2        |
| AHT260    | 16         | HEX          | CGCTATACCCACACCAGGAC                   | CCACAGAGGAAGGGATGC              | 240-255         | P2        |
| AHT211    | 26         | HEX          | TTAGCAGCCGAGAAATACGC                   | ATTCGCCGACTTTGGCA               | 90-105          | P1        |
| AHT253    | 23         | 6-FAM        | ACATTTGTGGGCATTGGGGCTG                 | TGCACATGGAGGACAAGCACGC          | 280-290         | P1        |
| INRA121   | 21         | NED          | ATGTAGTTGAGATTTCCTACGG                 | TAATGGCTGATTATTGGTGG            | 85-110          | P1        |
| INU005    | 33         | 6-FAM        | CTTTCTACCAGCAAGGTAC                    | TTCCCATTTAATTGCCTCT             | 105-140         | P5        |
| INU030    | 12         | 6-FAM        | GGCTCCATGCTCAAGTCTGT                   | CATTGAAAGGGAATGCTGGT            | 145-155         | P4        |
| INU055    | 10         | HEX          | CCAGGCGTCCCTATCCATCT                   | GCACCACTTTGGGCTCCTTC            | 205-230         | P4        |
| REN105L03 | 11         | HEX          | GGAATCAAAGCTGGCTCTCT                   | GAGATTGCTGCCCTTTTACC            | 230-245         | P3        |
| REN162C04 | 7          | HEX          | TTCCCTTTGCTTTAGTAGGTTTG                | TGGCTGTATTCTTTGGCACA            | 175-220         | P2        |
| REN169018 | 29         | NED          | CACCCAACCTGCTGTTCTT                    | ACTGTGTGAGCCAATCCCTT            | 145-180         | P3        |
| REN169D01 | 14         | 6-FAM        | AGTGGGTGCAAGTGAAC                      | AATAGCACATCTTCCCCACG            | 185-220         | P3        |
| REN247M23 | 15         | HEX          | TGGTAACACCAAGGCTTTCC                   | TGCTTTTCCAATGTTGGTGA            | 265-285         | P3        |
| REN54P11  | 18         | 6-FAM        | GGGGGAATTAACAAAGCCTGAG                 | TGCAAAATCTGAGCCCCACTG           | 220-250         | P2        |
| REN64E19  | 34         | HEX          | (30A) TGTATTTTAATGTGGCAGTTT            | GACAAGGACAGGCAATACAGT           | 160-200         | P3        |
| 0123rd    | 1          | PET          | CACGGACGCAACACGATTTA                   | CTCCTGACGCAGCAGTTGTC            | 175-220         | P6        |
| 0176rd    | 2          | FAM          | TGGCTTGGCAACATTGTCTC                   | ACCTGGGATTCTCTCGGTCA            | 335-400         | P7        |
| 0323rd    | 3          | NED          | GGAAGCAGCTGGGTTCTTAA                   | GTTTTCCATGCCCAACTATTTTGAA       | 300-320         | P7        |
| 0669rd    | 6          | NED          | TTGCCGAGATCACTCAAGGA                   | AATTCTGTGCCCCAAAGTGG            | 340-350         | P7        |
| 0914rd    | 9          | FAM          | TGCATGGTCACAACATCAG                    | GCACACAAAATTGTGCGGATA           | 280-295         | P7        |
| 0959rd    | 10         | NED          | CCAGCCAGATGCAAAACATTG                  | GCTCATGTGGTGTTTTGATG            | 260-280         | P6        |
| 1055rd    | 11         | VIC          | CCCAAGCTGGGAAGACAAAA                   | GGGTGGATTAGGGTGGACA             | 215-235         | P6        |
| 1257rd    | 13         | VIC          | TCACCTTCTGGATGGGAACC                   | ATCCTGCAGTTGCTGTGCTG            | 245-270         | P6        |
| 1404rd    | 15         | FAM          | AGGGCTGTTTGGAGGAACAA                   | GTTTCTTTGGTCTGACATGAGGGGAC<br>A | 135-160         | P6        |
| 1878rd    | 21         | FAM          | TGCCATAAATGCCCAGAACA                   | TGCCACCTGGCAGTCTTATG            | 245-270         | P6        |
| 2469rd    | 31         | FAM          | GTGCACCTTGCAAACCCTGA                   | TTGTAAGCAGGGGCAAGTGA            | 310-330         | P7        |
| 2642rd    | 35         | FAM          | GTTCCATGCATGCTGACACA                   | GGGGTGAGAATGATGGTGGT            | 85-110          | P6        |

**Table S2.** Genetic diversity parameters in Ca Rater Mallorquí. Microsatellite, number of alleles detected (NA), effective number of alleles (Ae), observed heterozygosity (Ho), expected heterozygosity (He), polymorphic information content (PIC), FIS and its confidence interval, and HWE deviations after Bonferroni correction.

| Microsatélite  | NA          | Ae          | HO           | HE           | PIC          | FIS          | FIS (IC)               | HW  |
|----------------|-------------|-------------|--------------|--------------|--------------|--------------|------------------------|-----|
| AHT121         | 9           | 4,53        | 0,813        | 0,785        | 0,756        | -0,349       | (-0,138-0,064)         | NS  |
| AHT137         | 7           | 3,86        | 0,698        | 0,747        | 0,710        | 0,066        | (-0,909-0,204)         | NS  |
| AHT130         | 10          | 5,98        | 0,783        | 0,840        | 0,812        | 0,068        | (-0,064-0,177)         | NS  |
| AHT171         | 9           | 5,21        | 0,828        | 0,815        | 0,782        | -0,017       | (-0,121-0,080)         | NS  |
| AHT260         | 7           | 2,68        | 0,688        | 0,631        | 0,573        | -0,090       | (-0,231-0,045)         | NS  |
| AHTK211 1      | 5           | 3,59        | 0,683        | 0,727        | 0,675        | 0,062        | (-0,076-0,196)         | NS  |
| AHTK253        | 5           | 3,82        | 0,778        | 0,744        | 0,694        | -0,046       | (-0,177-0,080)         | NS  |
| CXX279         | 6           | 5,64        | 0,758        | 0,829        | 0,797        | 0,086        | (-0,033-0,209)         | *   |
| FH2054         | 8           | 3,89        | 0,719        | 0,749        | 0,705        | 0,041        | (-0,103-0,176)         | NS  |
| FH2848         | 7           | 3,68        | 0,661        | 0,734        | 0,687        | 0,099        | (-0,055-0,234)         | NS  |
| INRA21         | 7           | 3,06        | 0,688        | 0,679        | 0,623        | -0,013       | (-0,172-0,142)         | NS  |
| INU005         | 5           | 2,42        | 0,656        | 0,591        | 0,532        | -0,111       | (-0,285-0,054)         | NS  |
| INU030         | 4           | 2,52        | 0,500        | 0,607        | 0,553        | 0,178        | (0,012-0,313)          | NS  |
| INU055         | 6           | 2,01        | 0,531        | 0,507        | 0,461        | -0,049       | (-0,209-0,120)         | NS  |
| REN105L03      | 9           | 3,46        | 0,703        | 0,717        | 0,674        | 0,019        | (-0,139-0,165)         | NS  |
| REN162C04      | 6           | 4,49        | 0,844        | 0,783        | 0,741        | -0,078       | (-0,192-0,036)         | NS  |
| REN169D01      | 8           | 5,60        | 0,688        | 0,828        | 0,799        | 0,171        | (0,036-0,292)          | NS  |
| REN169O18      | 9           | 5,34        | 0,844        | 0,819        | 0,790        | -0,030       | (-0,137-0,066)         | NS  |
| REN247M23      | 6           | 3,17        | 0,656        | 0,690        | 0,638        | 0,049        | (-0,095-0,280)         | NS  |
| REN54P11       | 11          | 2,73        | 0,563        | 0,639        | 0,618        | 0,120        | (-0,018- 0,244)        | NS  |
| REN64E19       | 8           | 2,93        | 0,597        | 0,664        | 0,629        | 0,102        | (-0,069-0,261)         | NS  |
| 0123RD         | 6           | 3,22        | 0,656        | 0,695        | 0,654        | 0,057        | (-0,075- 0,183)        | NS  |
| 0176RD         | 8           | 4,00        | 0,780        | 0,757        | 0,714        | -0,031       | (-0,1461-0,067)        | NS  |
| 0323RD         | 4           | 2,39        | 0,645        | 0,587        | 0,526        | -0,100       | (-0,282- 0,056)        | NS  |
| 0669RD         | 11          | 7,07        | 0,964        | 0,866        | 0,843        | -0,113       | (-0,188- (-0,042))     | *   |
| 0914RD         | 4           | 1,94        | 0,353        | 0,489        | 0,453        | 0,280        | (0,022-0,510)          | *   |
| 0959RD         | 2           | 1,62        | 0,161        | 0,386        | 0,310        | 0,584        | (0,324-0,803)          | *** |
| 1055RD         | 2           | 1,34        | 0,234        | 0,255        | 0,221        | 0,081        | (-0,156-0,365)         | NS  |
| 1257RD         | 6           | 2,93        | 0,581        | 0,664        | 0,601        | 0,127        | (-0,031-0,279)         | NS  |
| 1404RD         | 7           | 3,38        | 0,594        | 0,710        | 0,668        | 0,165        | (-0,008-0,325)         | NS  |
| 1878RD         | 6           | 3,60        | 0,581        | 0,728        | 0,681        | 0,204        | (0,044-0,363)          | NS  |
| 2469RD         | 4           | 2,93        | 0,661        | 0,665        | 0,591        | 0,005        | (-0,167-0,152)         | NS  |
| 2642rd         | 6           | 2,98        | 0,734        | 0,669        | 0,611        | -0,098       | (-0,249-0,039)         | NS  |
| <b>Average</b> | <b>6,61</b> | <b>3,58</b> | <b>0,655</b> | <b>0,685</b> | <b>0,640</b> | <b>0,044</b> | <b>(-0,0002-0,073)</b> |     |

NS: Non-significant. \*: P value <0,05, \*\*: P value <0,01, \*\*\*: P value < 0,001

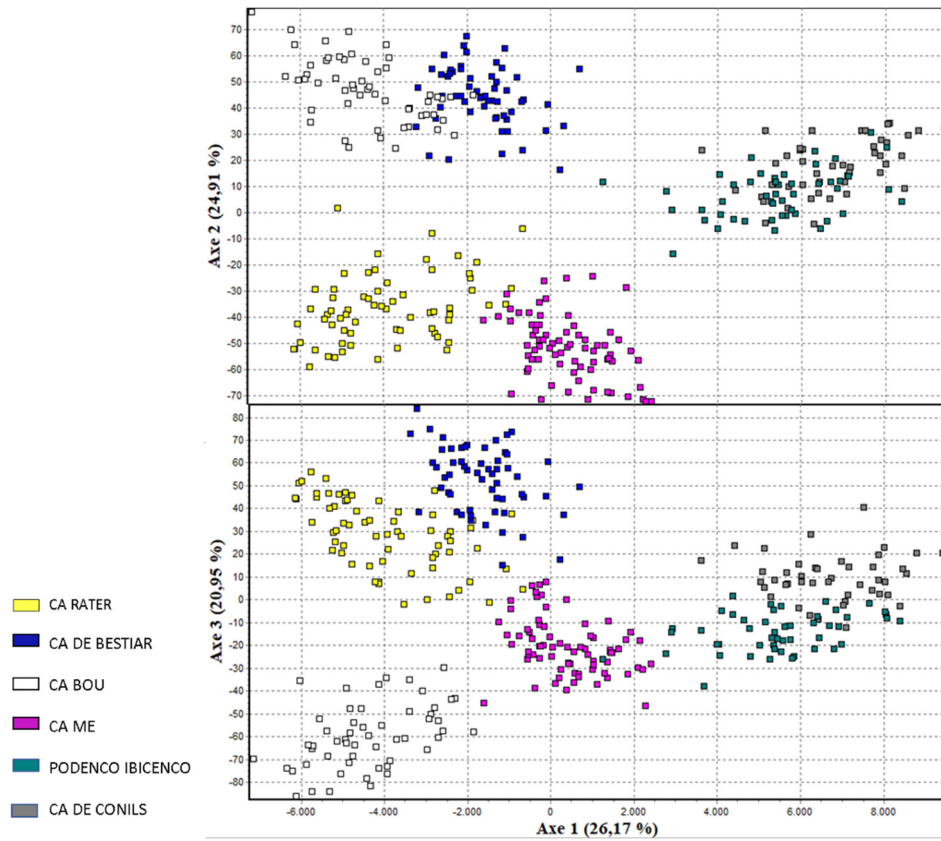

**Figure S1.** Spatial representation of genetic distances among the breeds analysed, from the first three axes obtained in the factorial analyses of correspondence based on microsatellite data. Values between brackets on axes represent the contribution in % of each axis to total inertia.

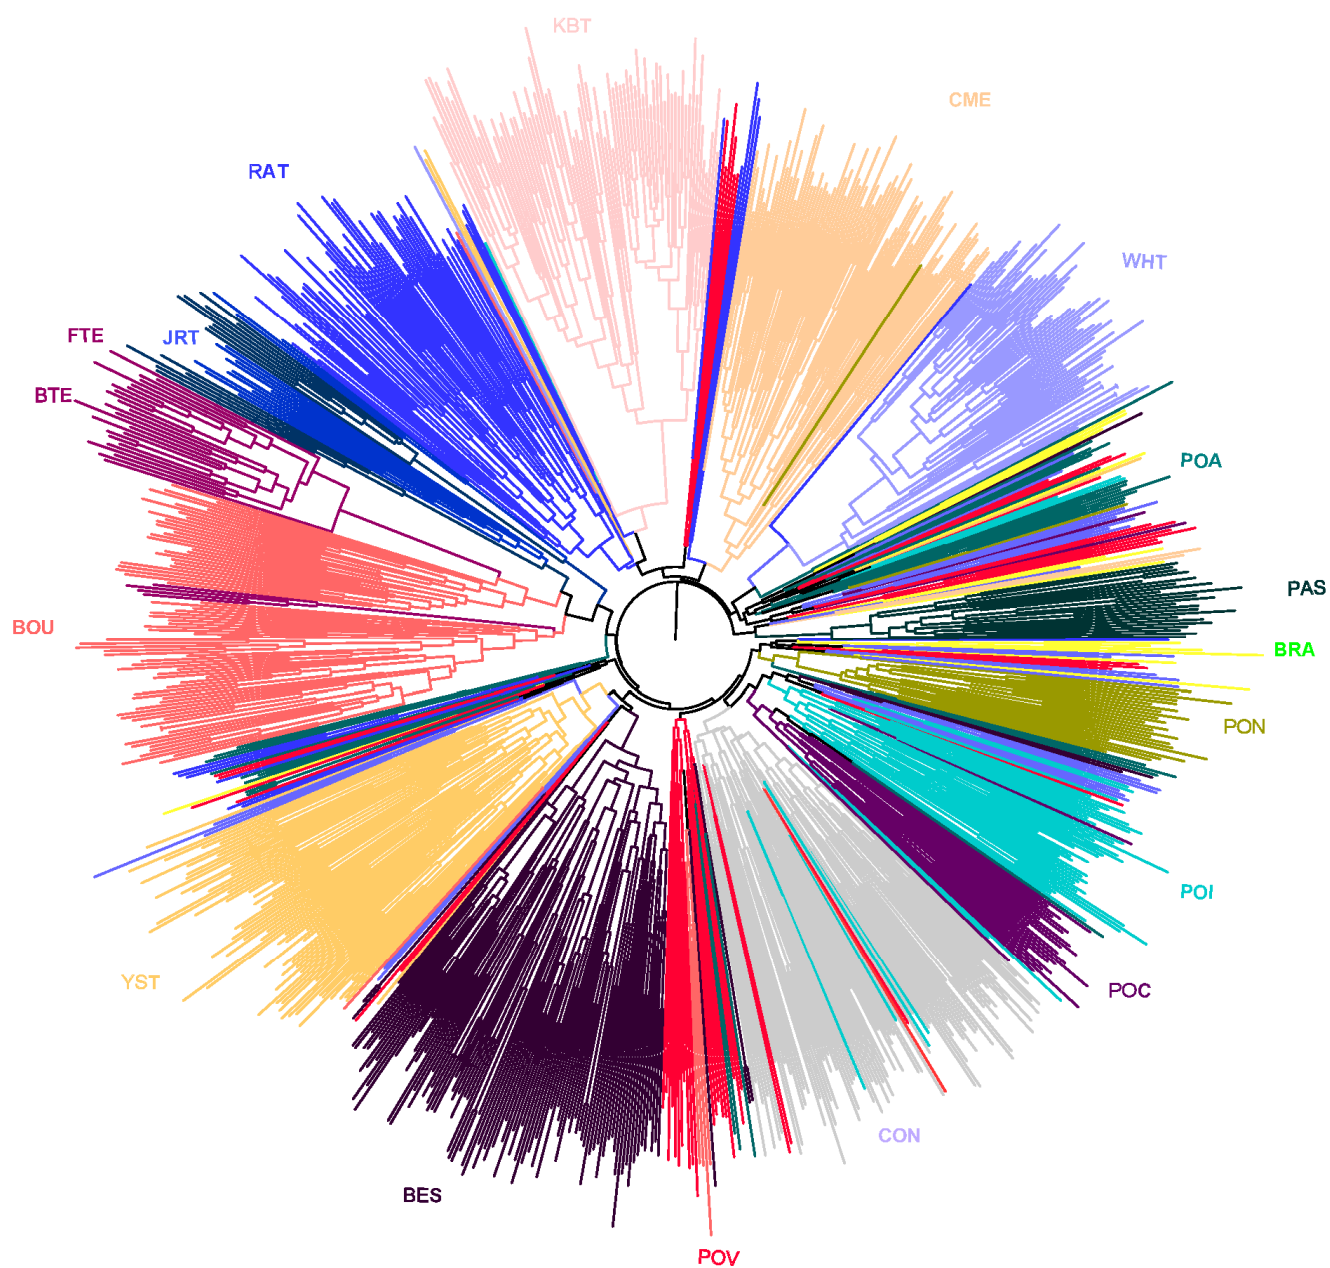

**Figure S2.** Individual Neighbour-joining representation of  $D_{AS}$  genetic distances between 18 dog breeds based on microsatellite data. Breed acronyms are as defined in Table 1.
